# Supplementary material for: Mechanism of lysine oxidase-like 1 promoting synovial inflammation mediating rheumatoid arthritis development
Source: publisher site journal article supplement (doi:10.18632/aging.205429), 2024-01-12
Supplement: Supplementary file [file aging-v16i1-205429-supplementary-material-SD1.pdf]

## SUPPLEMENTARY TABLES

**Supplementary Table 1. Primer sequences for GAPDH, INOS, COX2, TGF $\beta$ , IL6 and LOXL1.**

| Primer name      | Primer sequence            |
|------------------|----------------------------|
| H-GAPDH-F        | GGAAGCTTGTCATCAATGGAAATC   |
| H-GAPDH-R        | TGATGACCCTTTTGGCTCCC       |
| H-INOS-F         | GACTCACAGCCTTTGGACCTCA     |
| H-INOS-R         | GCTGGATGTCGGACTTTGTAGATT   |
| H-COX2-F         | AAGACAGATCATAAGCGAGGGC     |
| H-COX2-R         | AAACCGTAGATGCTCAGGGACT     |
| H-TGF $\beta$ -F | CAGCAACAATTCCTGGCGATA      |
| H-TGF $\beta$ -R | GCTAAGGCGAAAGCCCTCAAT      |
| H-IL6-F          | ATGAGGAGACTTGCTGGTGAA      |
| H-IL6-R          | CTCTGGCTTGTTCCCTCACTACTCTC |
| H-LOXL1-F        | TGCCACCAGCATTACCACAG       |
| H-LOXL1-R        | GAGGTTGCCGAAGTCACAGG       |

Abbreviations: F: Forward; R: Reverse; H: Human.

**Supplementary Table 2. Small interfering RNA sequence of LOXL1.**

| Home-Human        | siRNA sequences       |                       |
|-------------------|-----------------------|-----------------------|
|                   | Sense (5'-3')         | Antisense (5'-3')     |
| LOXL1-Homo-SiRNA1 | AAGCAUCCACUUAUGUGCATT | UGCACAUAGUGGAUGCUUGC  |
| LOXL1-Homo-SiRNA2 | GCUAUGCAUGCACCUCUCATT | UGAGAGGUGCAUGCAUAGCGC |
| LOXL1-Homo-SiRNA3 | ACGUGAACCCAAAGUAUAUTT | AUAUACUUUGGUUCACGUGC  |
