# Supplementary material for: Mechanism of lysine oxidase-like 1 promoting synovial inflammation mediating rheumatoid arthritis development
Source: Aging (Albany NY). 2024 Jan 12;16(1):928–47. doi: 10.18632/aging.205429 (PMC10817408; doi:10.18632/aging.205429)
Supplement: Supplementary Table 3 [file aging-16-205429-s002.xlsx]

## Sheet: Supplementary Table 3
Supplementary Table 3. 224 membrane-related genes.
Membrane-related genes
ACAN
ADAM10
ADAM17
ADAM9
ADAMTS10
ADAMTS13
ADAMTS17
ADAMTS18
ADAMTS2
ADAMTS3
AGRN
AMELX
AMTN
ANG
BGN
CD151
CERT1
COL12A1
COL13A1
COL17A1
COL18A1
COL2A1
COL4A1
COL4A2
COL4A3
COL4A4
COL4A5
COL4A6
COL5A1
COL6A1
COL6A2
COL6A3
COL7A1
COL8A2
COL9A1
COL9A2
COL9A3
COLQ
CST3
CTSA
CTSB
CTSD
DAG1
DCC
DCN
DDR2
ECM1
EFEMP1
EFEMP2
FBLN1
FBLN5
FBN1
FBN2
FGF9
FN1
FRAS1
FREM1
FREM2
GPC3
GPC4
GPC6
HMCN1
HSPG2
ITGA2B
ITGA3
ITGA6
ITGA7
ITGA8
ITGB2
ITGB3
ITGB4
ITGB6
LAMA1
LAMA2
LAMA3
LAMA4
LAMB1
LAMB2
LAMB3
LAMC2
LAMC3
LOXL1
MMP1
MMP14
MMP2
MMP21
MPZL2
MUSK
NTN1
P3H1
P3H2
PTPRF
PXDN
ROBO2
ROBO3
ROBO4
RPSA
SERPINF1
SMC3
SMOC1
SMOC2
SPARC
TENM3
TENM4
TGFB1
TGFB2
TGFBI
TIMP3
TLL1
TNC
USH2A
VCAN
ACHE
ADAMTS1
ADAMTS14
ADAMTS15
ADAMTS16
ADAMTS19
ADAMTS20
ADAMTS4
ADAMTS5
ADAMTS6
ADAMTS7
ADAMTS8
ADAMTS9
BCAN
CCDC80
CD44
COL14A1
COL15A1
COL28A1
COL8A1
CSPG4
DDR1
EGFL6
EGFLAM
EVA1A
EVA1B
EVA1C
FBLN2
FBN3
FMOD
FREM3
GPC1
GPC2
GPC5
HAPLN1
HAPLN2
HMCN2
ISLR
ITGA1
ITGA10
ITGA2
ITGA4
ITGA5
ITGA9
ITGAM
ITGAV
ITGAX
ITGB1
ITGB5
ITGB7
ITGB8
LAD1
LAMA5
LAMB4
LAMC1
LOXL2
LOXL4
LUM
MATN1
MATN2
MATN4
MEGF6
MEGF9
MEP1A
MEP1B
MMP17
MMP26
MMP7
MMRN2
NELL1
NELL2
NID1
NID2
NPNT
NTN4
OGN
OPTC
PAPLN
PHF13
PODN
POSTN
PTN
PXDNL
RECK
ROBO1
SDC1
SDC4
SEMA3B
SLIT1
SLIT2
SLIT3
SPARCL1
SPOCK1
SPOCK2
SPOCK3
SPON1
SPON2
TENM1
TENM2
THBS1
THBS2
THBS4
TIMP1
TIMP2
TINAG
TINAGL1
UNC5A
UNC5B
UNC5C
UNC5D
VTN
VWA1
